# Supplementary material
Source: Springer Nature journal article supplement (https://www.springerprofessional.de/resource/supplementary/13638_2013_1028_MOESM5_ESM.pdf/11899114)

$K = 100, L_{\max} = 2, N = 10, n = 3$

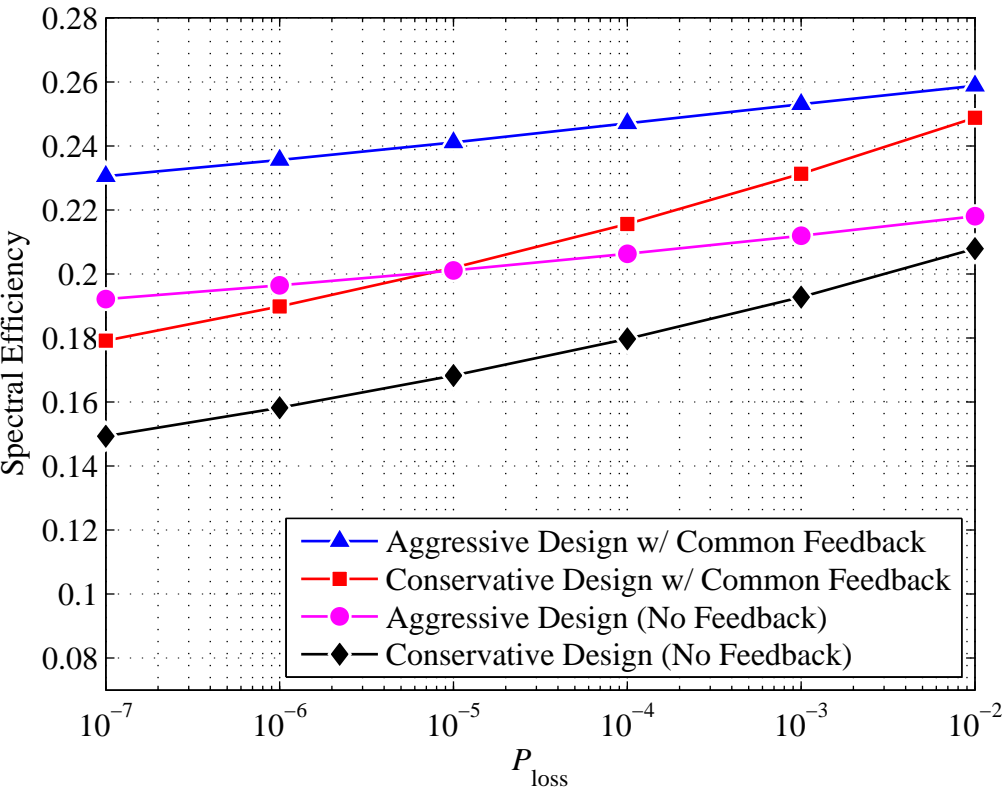

Supplement: MOESM5 [file 11899114]
